# Supplementary material
Source: Elsevier journal article supplement (https://www.sciencedirect.com/science/article/pii/S1885585725003287)
Supplement: mmc1 [file mmc1.doc]

**SUPPLEMENTARY DATA**

**Table S1.** Baseline clinical characteristics according to event occurrence during follow-up

|  | Patients wihout events  (n = 260) | Patients with events  (n = 48) | *P* |
| --- | --- | --- | --- |
| *Demographic and clinical characteristics* |  |  |  |
| Age, y | 63 [57-71] | 62 [52-74] | .568 |
| Female sex | 139 (53.4) | 25 (52.1) | .860 |
| Hypertension | 157 (60.4) | 27 (56.2) | .592 |
| Dyslipidemia | 158 (60.7) | 31 (64.6) | .618 |
| Diabetes mellitus | 59 (22.7) | 13 (27.1) | .509 |
| Current smoker | 50 (19.2) | 8 (16.6) | .676 |
| Previous smoker | 54 (20.7) | 12 (25) | .512 |
| Atrial fibrillation | 15 (5.7) | 6 (12.5) | .080 |
| Peripheral artery disease | 5 (1.9) | 2 (4.2) | .338 |
| CAD history | 59 (22.7) | 10 (20.8) | .056 |
| Previous PCI | 49 (18.8) | 8 (16.6) | .152 |
| ≥ 2 prior normal* coronary angiograms | 36 (13.8) | 7 (14.6) | .612 |
| LVEF, % | 60 (59-63) | 60 (59-60) | .874 |
| NT-proBNP, pg/mL | 304 [115.5-1048] | 833 [105.5-1253] | .525 |
| *Symptom***s** | | | | |
| Exertional angina | 147 (56.5) | 31 (64.5) | .702 |
| Angina at rest | 101 (38.8) | 27 (56.2) | .020 |
| *Coronary function testing* | | | | |
| FFR | 0.91 ± 0.2 | 0.90 ± 0.1 | .301 |
| CFR | 2.9 (1.8-3.9) | 2.3 (1.8-3.8) | .247 |
| IMR | 20.5 (12-32) | 18 (13-36) | .841 |

CFR, coronary flow reserve; CFT coronary function testing; FFR, fractional flow reserve; IMR, index of microcirculatory resistance; LVEF, left ventricle ejection fraction; PCI, percutaneous coronary intervention.

Data are expressed as No. (%), mean ± standard deviation, or median [interquartile range].

*Without obstructive coronary artery disease (> 50% diameter stenosis).

| Patient | Age, y | Sex | ECG changes | Peak hs-TnI*,  ng/L | ICA findings | LVEF, % | Echo contractile disorders |
| --- | --- | --- | --- | --- | --- | --- | --- |
| 1 | 80 | Female | ST depression V4-V6 | 45 | Normal coronary arteries | 62 | None |
| 2 | 48 | Female | T-wave inversion V3-V6 | 70 | Normal coronary arteries | 70 | None |
| 3 | 38 | Female | No changes | 140 | Normal coronary arteries | 65 | None |
| 4 | 58 | Male | ST depression V3-V6 | 110 | Normal coronary arteries | 58 | None |

**Table S2.** Clinical, laboratory, and imaging characteristics of patients with myocardial infarction during follow-up

ECG, electrocardiogram; ICA, invasive coronary angiography; LVEF, left ventricular ejection fraction; peak hs-TnI, peak value of high-sensitivity troponin I.

* Normal cutoff value (99th percentile): female 0-11.6 ng/L; male 0-19.8 ng/L.
